# Supplementary material for: Sex-dependent behavioral deficits and neuropathology in a maternal immune activation model of autism
Source: PubMed Central journal article supplement (PMC6438965; doi:10.1038/s41398-019-0457-y), 2019-03-28
Supplement: 41398_2019_457_MOESM2_ESM.pdf [file 41398_2019_457_MOESM2_ESM.pdf]

**Supplementary Table 1: Stereological sampling parameters in various brain regions implicated in motor control and coordination**

| Brain region | Neurons counted/staining        | No. of sections | Counting frame area ( $\mu\text{m}$ ) | Sampling grid area ( $\mu\text{m}$ ) |
|--------------|---------------------------------|-----------------|---------------------------------------|--------------------------------------|
| Sim          | PC/cresyl                       | 4               | 50 x 50                               | 130 x 170                            |
| 6cb          |                                 | 4               |                                       |                                      |
| Crus I       |                                 | 5               |                                       |                                      |
| Crus II      |                                 | 4               |                                       | 170 x 130                            |
| PM           |                                 | 4               |                                       |                                      |
| 7cb          |                                 | 3               |                                       |                                      |
| SNc          | TH+/ anti-TH mouse              | 5               |                                       | 150 x 150                            |
| Striatum     | Total neurons/ anti-NeuN rabbit | 12              | 40 x 40                               | 375 x 325                            |
| M1/M2        | Total neurons/ anti-NeuN rabbit | 6               | 40 x 40                               | 375 x 325                            |
